# Supplementary material for: Functional connectomics reveals general wiring rule in mouse visual cortex
Source: PubMed Central journal article supplement (PMC10054929; doi:10.1101/2023.03.13.531369), 2023-03-14
Supplement: NIHPP2023.03.13.531369V1-supplement-1.pdf [file NIHPP2023.03.13.531369V1-supplement-1.pdf]

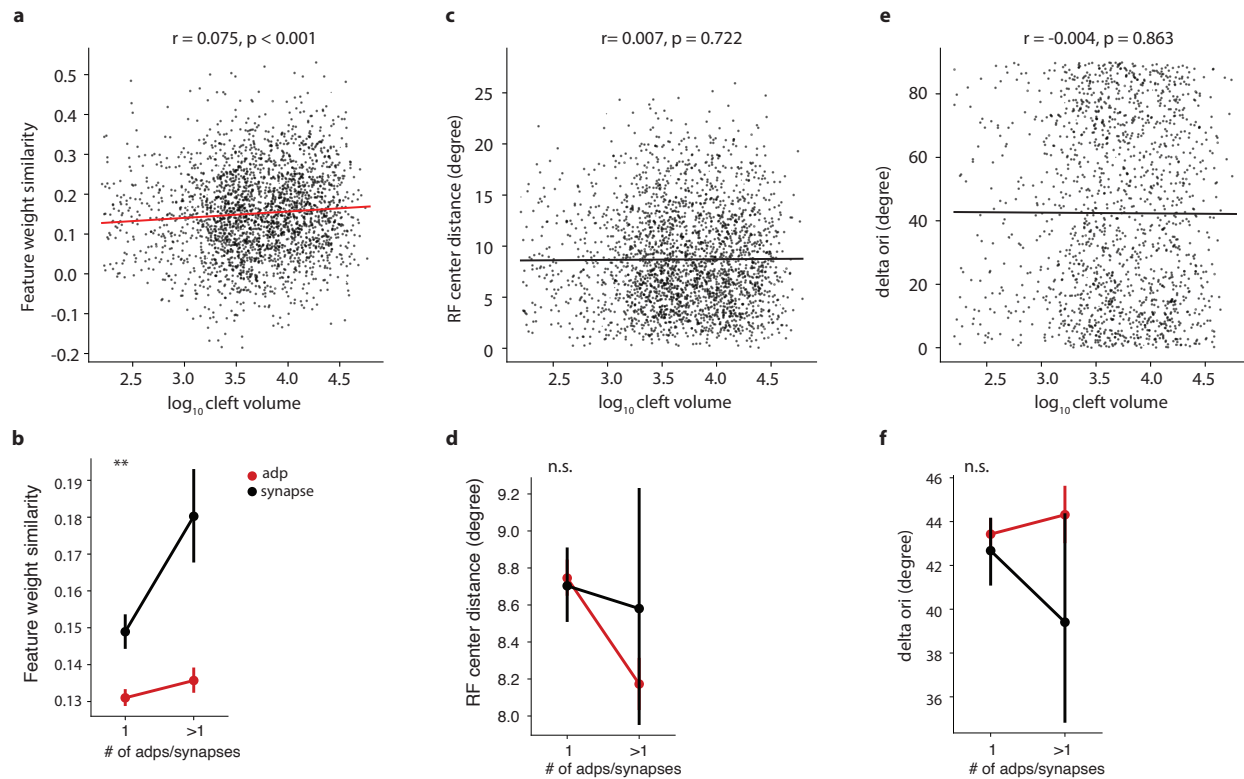

**Supplemental Figure 1. Functional similarity predicts synaptic volume and number.** **a, c, e**, Presynaptic-postsynaptic pairwise feature weight similarity (**a**), receptive field center distance (**c**), and difference in preferred orientation (**e**) as a function of synapse size ( $\log_{10}$  cleft volume in voxels,  $r$  = pearson correlation coefficient, two sided p-value). **b, d, f**, Mean presynaptic-postsynaptic pairwise feature weight similarity (**b**), receptive field center distance (**d**), and difference in preferred orientation (**f**) for pairs with single versus multiple synapses (black) or ADPs (red). p-value by two way ANOVA.

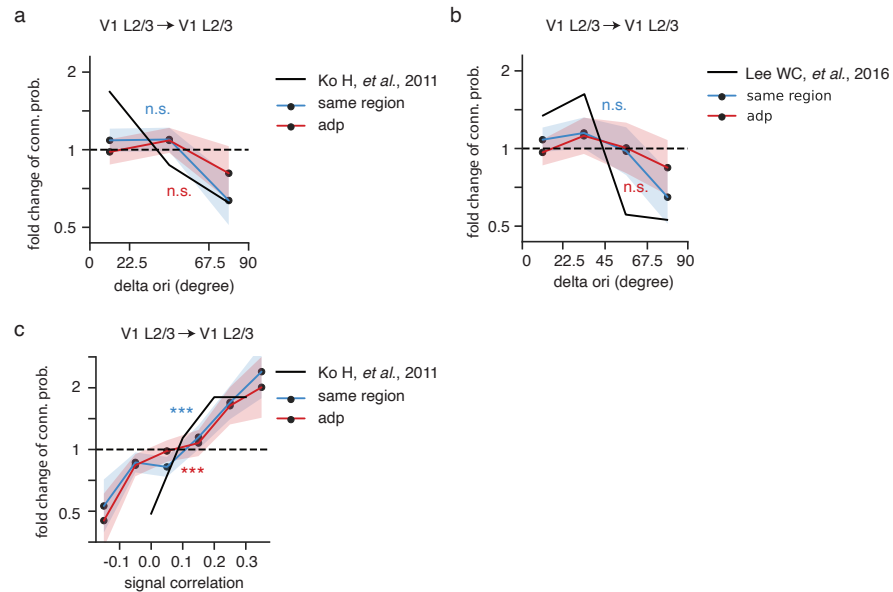

**Supplemental Figure 2. Comparison of V1 L2/3 like-to-like findings to Ko et al. 2011 and Lee et al. 2016.** **a**, As in Fig. 3i, but all presynaptic, postsynaptic, and control neurons restricted to V1 L2/3 (red,blue). Ko et al. 2011 data (black) and binning from Ko et al. 2011 Fig. 2b. **b**, As in **a**, but Lee et al. 2016 data (black) and binning from Lee et al. 2016 Fig. 2b. **c**, As in Fig. 2g, but all presynaptic, postsynaptic, and control neurons restricted to V1 L2/3 (red, blue). Ko et al. 2011 data (black) and binning from Ko et al. 2011 Fig. 3c.

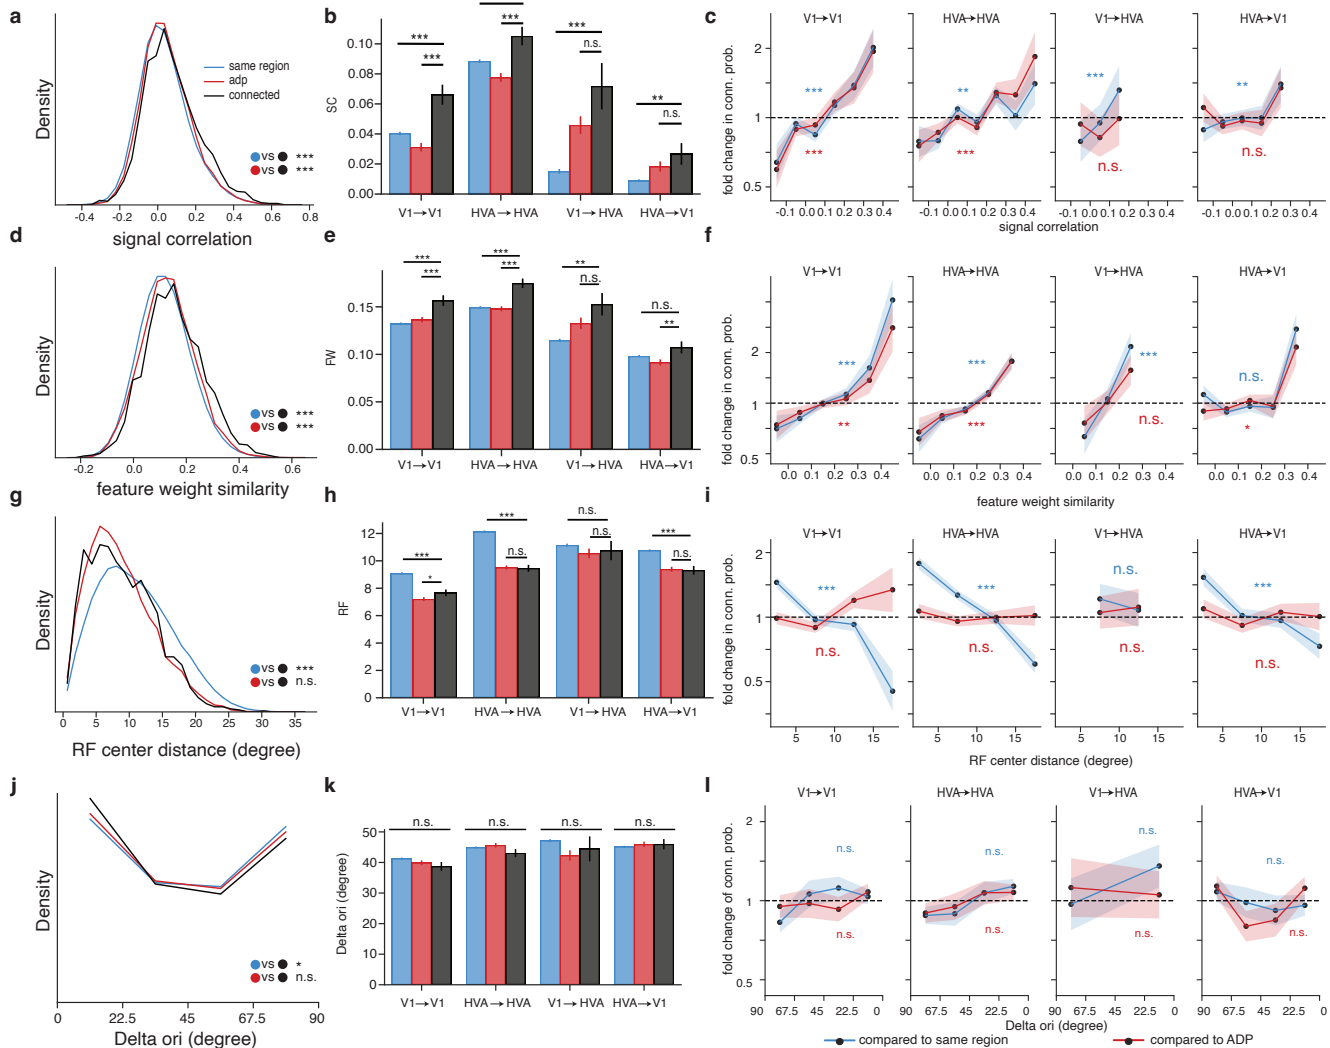

**Supplemental Figure 3. Functional similarity selectivity findings consistent in orientation-tuned subsample. a, b, c,** Selectivity with respect to signal correlation as Fig. 2c, e, g, but restricted to orientation-tuned neurons as in Fig. 3g, h, i. **d, e, f,** Same as **a, b, c,** but with respect to feature weight similarity as in Fig. 3a, b, c. **g, h, i,** Same as **a, b, c,** but with respect to receptive field center distance as in Fig. 3d, e, f. **j, k, l,** Same as Fig. 3g, h, i, duplicated here for reference.

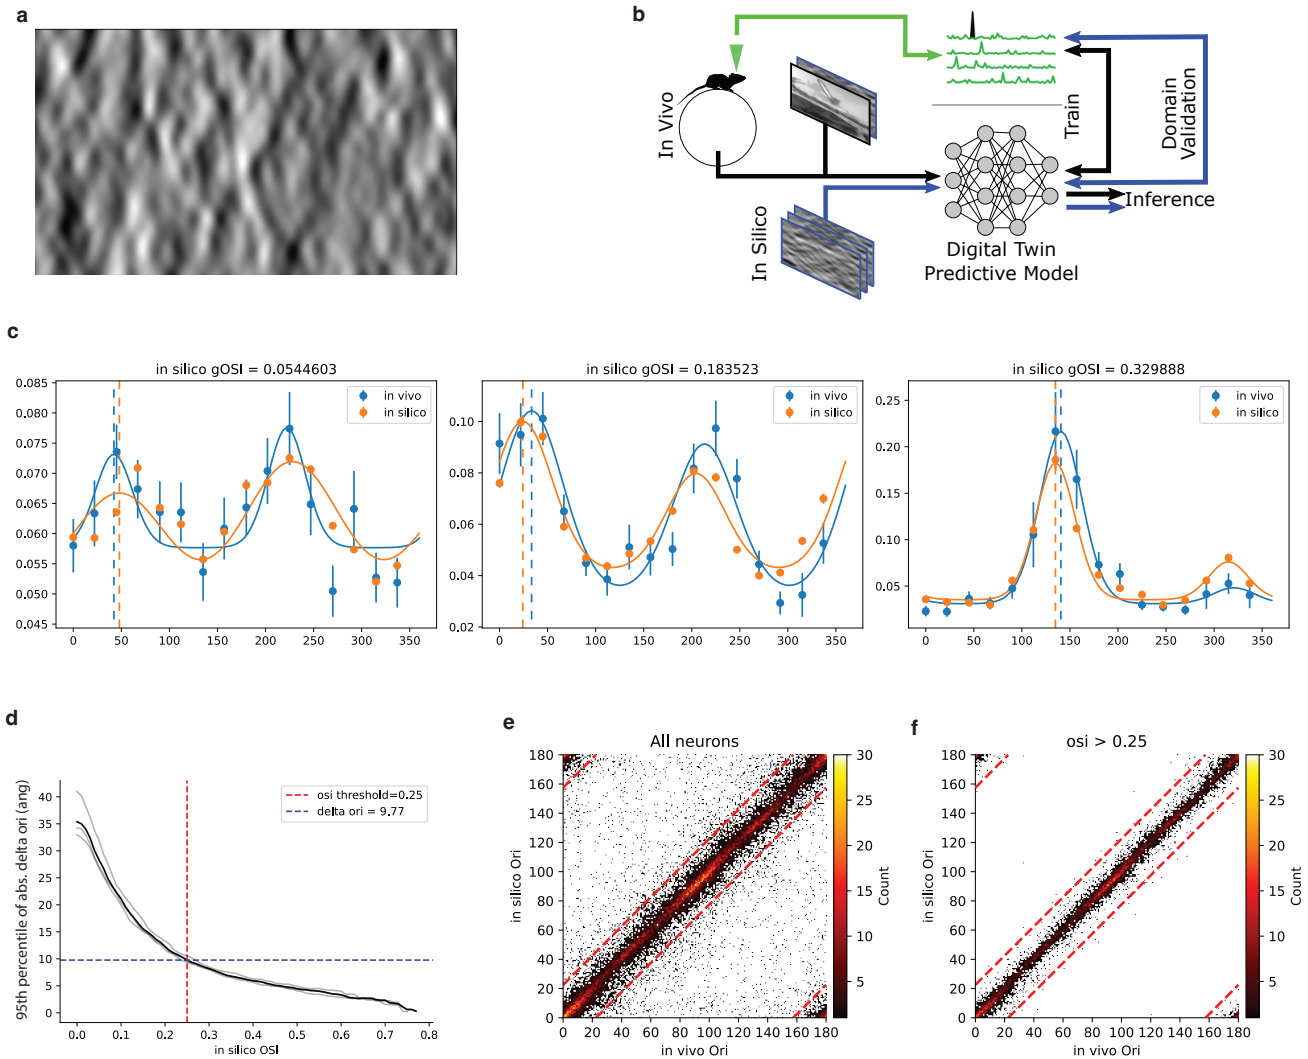

**Supplemental Figure 4. In silico orientation tuning is consistent with in vivo orientation tuning** **a**, Sample frame from global directional parametric stimulus ("Monet") used to characterize orientation and direction selectivity. Directional motion was orthogonal to orientation, and was tested at 22.5° intervals. **b**, Schematic of domain validation experimental design. In a single scan in a new animal, neuronal responses are collected in response to sufficient stimulus to both train the digital twin model and characterize orientation tuning from *in vivo* responses. Later, *in silico* orientation tuning is extracted from model responses to parametric stimuli, and compared against *in vivo* orientation tuning for the same neurons. **c**, Comparison of *in silico* and *in vivo* mean responses per stimulus direction (mean  $\pm$  SEM), fitted tuning curves (lines), and extracted preferred orientation (dotted lines) for three neurons. **d**, 95th percentile difference in preferred orientation between *in silico* and *in vivo* fitted responses as a function of gOSI threshold. Dotted lines correspond to gOSI > 0.25 threshold applied for all analyses and resulting 95th percentile difference in preferred orientation  $\approx$  9.77 deg across all three animals imaged. Lines correspond to individual animals (gray) or cumulative across all animals (black). **e**, **f**, Two-dimensional histogram of *in silico* versus *in vivo* preferred orientation for all neurons across three animals (**e**) and only neurons with gOSI > 0.25 (**f**).
